# Supplementary material for: Transformation of a Ferry Ship into a Ship Hospital for COVID-19 Patients
Source: Int J Environ Res Public Health. 2020 Dec 2;17(23):8976. doi: 10.3390/ijerph17238976 (PMC7730349; doi:10.3390/ijerph17238976)
Supplement: Supplementary file 1 [file ijerph-17-08976-s001.pdf]

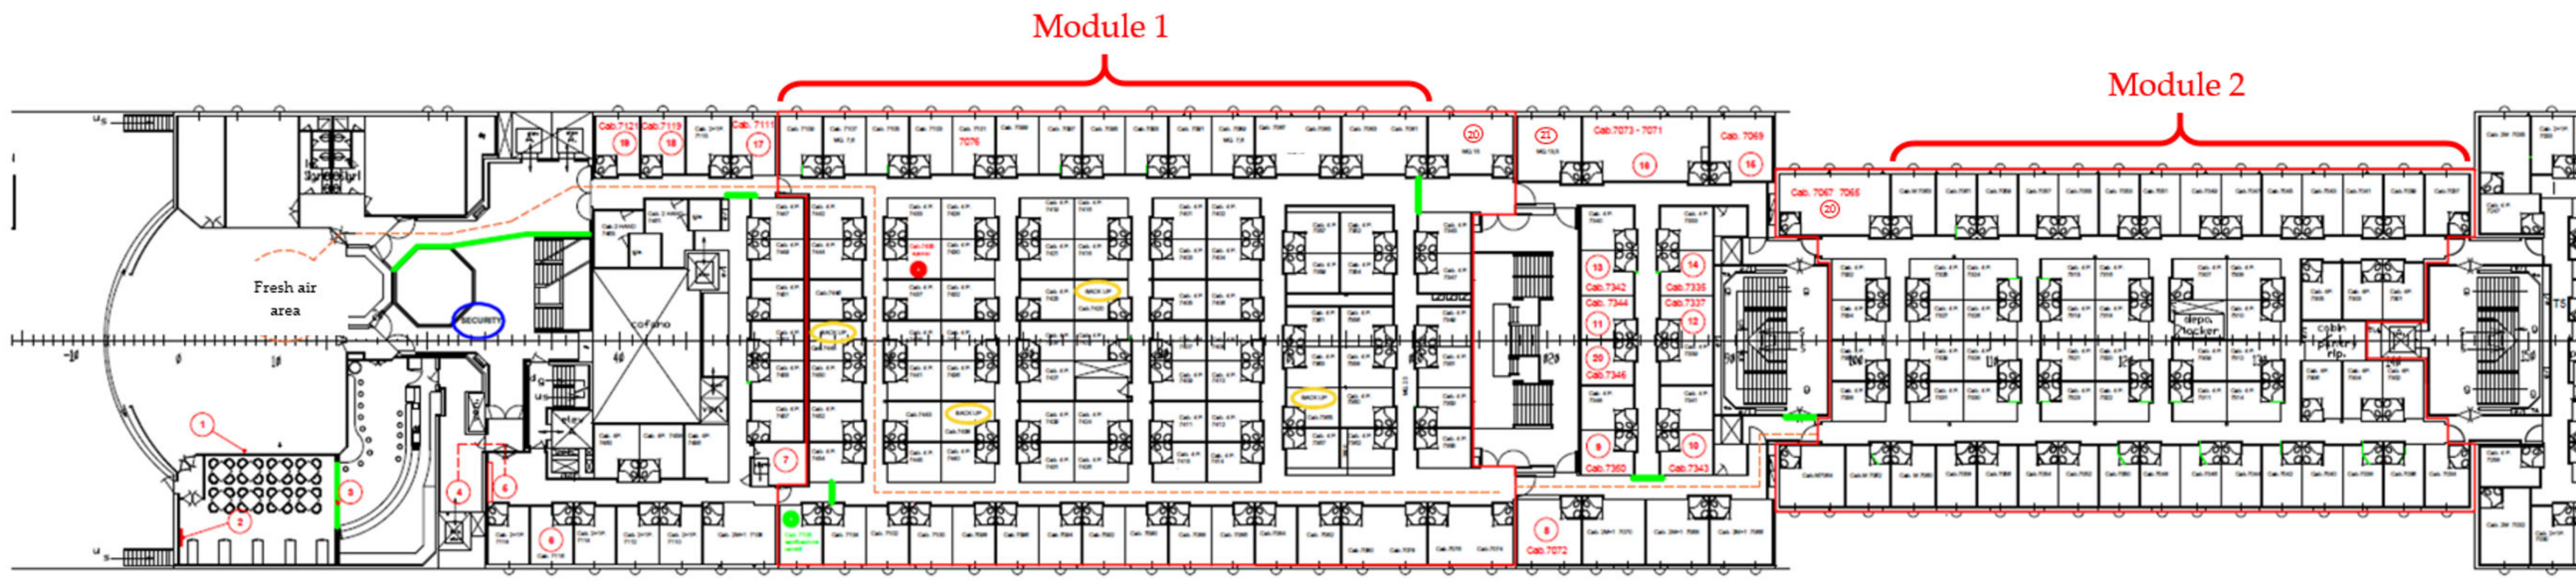

- Legend:
- ① - Patients buffet
  - ② - TV lounge
  - ③ - Bulkhead isolating TV room
  - ④ - Patients Meal Delivery Area
  - ⑤ - Patient Meal and Tray Composition Area
  - Bulkhead

- ⑥ - Hospital kitchen
- ⑦ - Deposit & Storage " Ideal Service " Products
- ⑧ - Clean Linen
- ⑨ & ⑩ - Locker Room " Ideal Service ".
- ⑪ & ⑫ - Medical facilities
- ⑬ & ⑭ - Pharmacy

- ⑮ - Health Director Office
- ⑯ - Operative Centre
- ⑰ - Dirty Linen
- ⑱ & ⑲ - Special Wastes
- ⑳ - Undressing area
- ㉑ - Dressing area
